# Supplementary material
Source: Research Square preprint supplement (doi:10.21203/rs.3.rs-9220794/v1)
Supplement: Supplementary file 1 [file a1914d88706c8b067fc9803c.docx]

Table of Contents

[Supplementary Table 1 2](#_Toc197898241)

[Supplementary Table 2 3](#_Toc197898241)

[Supplementary Table 3 6](#_Toc197898241)

Supplementary Table 1 Comparative Analysis of Treatment-Related Toxicities: HFRT vs. CFRT in the Overall Cohort

| Variables | Total (n = 201) | CFRT (n = 132) | HFRT (n = 69) | Statistic | *P* |
| --- | --- | --- | --- | --- | --- |
|
| Acute Radiation Pneumonitis ≥ Grade 2, n (%) |  |  |  | χ²=4.27 | **0.039** |
| No | 123 (61.19) | 74 (56.06) | 49 (71.01) |  |  |
| Yes | 78 (38.81) | 58 (43.94) | 20 (28.99) |  |  |
| Pulmonary Fibrosis ≥ Grade 2, n (%) |  |  |  | χ²=2.11 | 0.147 |
| No | 154 (76.62) | 97 (73.48) | 57 (82.61) |  |  |
| Yes | 47 (23.38) | 35 (26.52) | 12 (17.39) |  |  |
| Acute Radiation Esophagitis ≥ Grade 2, n (%) |  |  |  | χ²=0.50 | 0.478 |
| No | 171 (85.07) | 114 (86.36) | 57 (82.61) |  |  |
| Yes | 30 (14.93) | 18 (13.64) | 12 (17.39) |  |  |
| Bone Marrow Suppression (Hemoglobin) ≥ Grade 2, n (%) |  |  |  | χ²=6.08 | **0.014** |
| No | 185 (92.04) | 117 (88.64) | 68 (98.55) |  |  |
| Yes | 16 (7.96) | 15 (11.36) | 1 (1.45) |  |  |
| Bone Marrow Suppression (Leukocytes) ≥ Grade 2, n (%) |  |  |  | χ²=11.99 | **<.001** |
| No | 155 (77.11) | 92 (69.70) | 63 (91.30) |  |  |
| Yes | 46 (22.89) | 40 (30.30) | 6 (8.70) |  |  |
| Bone Marrow Suppression (Platelets) ≥ Grade 2, n (%) |  |  |  | χ²=5.50 | **0.019** |
| No | 186 (92.54) | 118 (89.39) | 68 (98.55) |  |  |
| Yes | 15 (7.46) | 14 (10.61) | 1 (1.45) |  |  |

Note: Data are presented as number of patients (percentage). Group comparisons were performed using the Chi-square test.

Supplementary Table 2. Nested Cox Models for Overall Survival: Stepwise Adjustment for Confounders

- - 1. Model 1:Univariate and Multivariate Cox Proportional Hazards Model Results

| Variables | Univariate Model | | | | |  | Multivariate Model | | | | |
| --- | --- | --- | --- | --- | --- | --- | --- | --- | --- | --- | --- |
| β | S.E | Z | *P* | HR (95%CI) | β | S.E | Z | *P* | HR (95%CI) |
| Group |  |  |  |  |  |  |  |  |  |  |  |
| CFRT |  |  |  |  | 1.00 (Reference) |  |  |  |  |  | 1.00 (Reference) |
| HFRT | 0.42 | 0.25 | 1.73 | 0.084 | 1.53 (0.94 ~ 2.48) |  | 0.42 | 0.25 | 1.73 | 0.084 | 1.53 (0.94 ~ 2.48) |
| HR: Hazard Ratio, CI: Confidence Interval | | | | | | | | | | | |

- - 1. Model 2:Univariate and Multivariate Cox Proportional Hazards Model Results

| Variables | Univariate Model | | | | |  | Multivariate Model | | | | |
| --- | --- | --- | --- | --- | --- | --- | --- | --- | --- | --- | --- |
| β | S.E | Z | *P* | HR (95%CI) | β | S.E | Z | *P* | HR (95%CI) |
| Group |  |  |  |  |  |  |  |  |  |  |  |
| CFRT |  |  |  |  | 1.00 (Reference) |  |  |  |  |  | 1.00 (Reference) |
| HFRT | 0.42 | 0.25 | 1.73 | 0.084 | 1.53 (0.94 ~ 2.48) |  | 0.44 | 0.25 | 1.79 | 0.073 | 1.56 (0.96 ~ 2.52) |
| Sex |  |  |  |  |  |  |  |  |  |  |  |
| Male |  |  |  |  | 1.00 (Reference) |  |  |  |  |  | 1.00 (Reference) |
| Female | 0.12 | 0.32 | 0.39 | 0.696 | 1.13 (0.61 ~ 2.11) |  | 0.16 | 0.32 | 0.50 | 0.614 | 1.17 (0.63 ~ 2.19) |
| Age | 0.01 | 0.01 | 0.63 | 0.532 | 1.01 (0.98 ~ 1.03) |  | 0.01 | 0.01 | 0.74 | 0.457 | 1.01 (0.98 ~ 1.04) |
| HR: Hazard Ratio, CI: Confidence Interval | | | | | | | | | | | |

- - 1. Model 3:Univariate and Multivariate Cox Proportional Hazards Model Results

| Variables | Univariate Model | | | | |  | Multivariate Model | | | | |
| --- | --- | --- | --- | --- | --- | --- | --- | --- | --- | --- | --- |
| β | S.E | Z | *P* | HR (95%CI) | β | S.E | Z | *P* | HR (95%CI) |
| Group |  |  |  |  |  |  |  |  |  |  |  |
| CFRT |  |  |  |  | 1.00 (Reference) |  |  |  |  |  | 1.00 (Reference) |
| HFRT | 0.42 | 0.25 | 1.73 | 0.084 | 1.53 (0.94 ~ 2.48) |  | 0.36 | 0.26 | 1.38 | 0.168 | 1.44 (0.86 ~ 2.41) |
| Sex |  |  |  |  |  |  |  |  |  |  |  |
| Male |  |  |  |  | 1.00 (Reference) |  |  |  |  |  | 1.00 (Reference) |
| Female | 0.12 | 0.32 | 0.39 | 0.696 | 1.13 (0.61 ~ 2.11) |  | 0.11 | 0.32 | 0.34 | 0.735 | 1.11 (0.60 ~ 2.08) |
| Age | 0.01 | 0.01 | 0.63 | 0.532 | 1.01 (0.98 ~ 1.03) |  | 0.01 | 0.01 | 0.62 | 0.534 | 1.01 (0.98 ~ 1.03) |
| CCRT |  |  |  |  |  |  |  |  |  |  |  |
| No |  |  |  |  | 1.00 (Reference) |  |  |  |  |  | 1.00 (Reference) |
| Yes | -0.63 | 0.31 | -2.06 | **0.039** | 0.53 (0.29 ~ 0.97) |  | -0.44 | 0.33 | -1.35 | 0.177 | 0.64 (0.34 ~ 1.22) |
| Immunotherapy during Radiotherapy |  |  |  |  |  |  |  |  |  |  |  |
| No |  |  |  |  | 1.00 (Reference) |  |  |  |  |  | 1.00 (Reference) |
| Yes | -0.51 | 0.47 | -1.10 | 0.273 | 0.60 (0.24 ~ 1.50) |  | -0.22 | 0.48 | -0.47 | 0.640 | 0.80 (0.31 ~ 2.04) |
| Consolidative Immunotherapy |  |  |  |  |  |  |  |  |  |  |  |
| No |  |  |  |  | 1.00 (Reference) |  |  |  |  |  | 1.00 (Reference) |
| Yes | -0.60 | 0.25 | -2.44 | **0.015** | 0.55 (0.34 ~ 0.89) |  | -0.59 | 0.25 | -2.36 | **0.018** | 0.55 (0.34 ~ 0.90) |
| HR: Hazard Ratio, CI: Confidence Interval | | | | | | | | | | | |

- - 1. Model 4:Univariate and Multivariate Cox Proportional Hazards Model Results

| Variables | Univariate Model | | | | |  | Multivariate Model | | | | |
| --- | --- | --- | --- | --- | --- | --- | --- | --- | --- | --- | --- |
| β | S.E | Z | *P* | HR (95%CI) | β | S.E | Z | *P* | HR (95%CI) |
| Group |  |  |  |  |  |  |  |  |  |  |  |
| CFRT |  |  |  |  | 1.00 (Reference) |  |  |  |  |  | 1.00 (Reference) |
| HFRT | 0.42 | 0.25 | 1.73 | 0.084 | 1.53 (0.94 ~ 2.48) |  | 0.26 | 0.27 | 0.95 | 0.340 | 1.29 (0.76 ~ 2.19) |
| Sex |  |  |  |  |  |  |  |  |  |  |  |
| Male |  |  |  |  | 1.00 (Reference) |  |  |  |  |  | 1.00 (Reference) |
| Female | 0.12 | 0.32 | 0.39 | 0.696 | 1.13 (0.61 ~ 2.11) |  | 0.35 | 0.32 | 1.07 | 0.283 | 1.42 (0.75 ~ 2.68) |
| Age | 0.01 | 0.01 | 0.63 | 0.532 | 1.01 (0.98 ~ 1.03) |  | 0.01 | 0.01 | 0.49 | 0.627 | 1.01 (0.98 ~ 1.03) |
| CCRT |  |  |  |  |  |  |  |  |  |  |  |
| No |  |  |  |  | 1.00 (Reference) |  |  |  |  |  | 1.00 (Reference) |
| Yes | -0.63 | 0.31 | -2.06 | **0.039** | 0.53 (0.29 ~ 0.97) |  | -0.36 | 0.33 | -1.09 | 0.275 | 0.70 (0.37 ~ 1.33) |
| Immunotherapy during Radiotherapy |  |  |  |  |  |  |  |  |  |  |  |
| No |  |  |  |  | 1.00 (Reference) |  |  |  |  |  | 1.00 (Reference) |
| Yes | -0.51 | 0.47 | -1.10 | 0.273 | 0.60 (0.24 ~ 1.50) |  | -0.58 | 0.49 | -1.18 | 0.238 | 0.56 (0.21 ~ 1.47) |
| Consolidative Immunotherapy |  |  |  |  |  |  |  |  |  |  |  |
| No |  |  |  |  | 1.00 (Reference) |  |  |  |  |  | 1.00 (Reference) |
| Yes | -0.60 | 0.25 | -2.44 | **0.015** | 0.55 (0.34 ~ 0.89) |  | -0.63 | 0.26 | -2.47 | **0.014** | 0.53 (0.32 ~ 0.88) |
| Total GTV | 0.01 | 0.00 | 4.59 | **<.001** | 1.01 (1.01 ~ 1.01) |  | 0.01 | 0.00 | 4.67 | **<.001** | 1.01 (1.01 ~ 1.01) |
| HR: Hazard Ratio, CI: Confidence Interval | | | | | | | | | | |

### Supplementary Table 3. Comparison of Baseline Characteristics Between HFRT and CFRT Groups Before and After Propensity Score Matchin

| Variable | Before PSM | | | | | |  | After PSM | | | | |
| --- | --- | --- | --- | --- | --- | --- | --- | --- | --- | --- | --- | --- |
| Total (n = 201) | CFRT (n = 132) | HFRT (n = 69) | Statistic | *P* | SMD | Total (n = 128) | CFRT(n = 64) | HFRT(n = 64) | Statistic | *P* | SMD |
| Total GTV volume, M (Q₁, Q₃) | 57.39 (29.25, 110.20) | 55.64 (29.18, 92.52) | 69.71 (31.52, 126.73) | Z=-1.078 | 0.281 | 0.132 |  | 65.74 (31.78, 116.69) | 65.03 (36.39, 115.93) | 65.74 (30.22, 118.65) | Z=-0.450 | 0.652 | -0.070 |
| KPS , n (%) |  |  |  | χ²=0.160 | 0.689 |  |  |  |  |  | χ²=0.000 | 1.000 |  |
| >80 | 151 (75.12) | 98 (74.24) | 53 (76.81) |  |  | 0.061 |  | 98 (76.56) | 49 (76.56) | 49 (76.56) |  |  | 0.000 |
| ≤80 | 50 (24.88) | 34 (25.76) | 16 (23.19) |  |  | -0.061 |  | 30 (23.44) | 15 (23.44) | 15 (23.44) |  |  | 0.000 |
| Age, M (Q₁, Q₃) | 65.00 (58.00, 69.00) | 65.00 (57.00, 69.00) | 66.00 (60.00, 70.00) | Z=-0.477 | 0.633 | 0.007 |  | 65.50 (59.75, 70.00) | 65.50 (60.00, 70.00) | 65.50 (59.00, 70.00) | Z=-0.613 | 0.540 | -0.127 |
| Pathological Type, n(%) |  |  |  | χ²=1.148 | 0.563 |  |  |  |  |  | - | 0.912 |  |
| Squamous cell carcinoma | 134 (66.67) | 89 (67.42) | 45 (65.22) |  |  | -0.046 |  | 85 (66.41) | 44 (68.75) | 41 (64.06) |  |  | -0.098 |
| Adenocarcinoma | 57 (28.36) | 38 (28.79) | 19 (27.54) |  |  | -0.028 |  | 35 (27.34) | 16 (25.00) | 19 (29.69) |  |  | 0.103 |
| Other | 10 (4.98) | 5 (3.79) | 5 (7.25) |  |  | 0.133 |  | 8 (6.25) | 4 (6.25) | 4 (6.25) |  |  | 0.000 |
| Clinical Stage, n (%) |  |  |  | χ²=3.384 | 0.496 |  |  |  |  |  | χ²=0.427 | 0.980 |  |
| IIIA | 55 (27.36) | 40 (30.30) | 15 (21.74) |  |  | -0.208 |  | 28 (21.88) | 13 (20.31) | 15 (23.44) |  |  | 0.074 |
| IIIB | 58 (28.86) | 37 (28.03) | 21 (30.43) |  |  | 0.052 |  | 37 (28.91) | 18 (28.12) | 19 (29.69) |  |  | 0.034 |
| IIIC | 30 (14.93) | 20 (15.15) | 10 (14.49) |  |  | -0.019 |  | 18 (14.06) | 9 (14.06) | 9 (14.06) |  |  | 0.000 |
| IVA | 47 (23.38) | 30 (22.73) | 17 (24.64) |  |  | 0.044 |  | 35 (27.34) | 19 (29.69) | 16 (25.00) |  |  | -0.108 |
| IVB | 11 (5.47) | 5 (3.79) | 6 (8.70) |  |  | 0.174 |  | 10 (7.81) | 5 (7.81) | 5 (7.81) |  |  | 0.000 |
| Sex , n(%) |  |  |  | χ²=0.650 | 0.420 |  |  |  |  |  | χ²=0.000 | 1.000 |  |
| Male | 169 (84.08) | 109 (82.58) | 60 (86.96) |  |  | 0.130 |  | 110 (85.94) | 55 (85.94) | 55 (85.94) |  |  | 0.000 |
| Female | 32 (15.92) | 23 (17.42) | 9 (13.04) |  |  | -0.130 |  | 18 (14.06) | 9 (14.06) | 9 (14.06) |  |  | 0.000 |
| Smoking, n(%) |  |  |  | χ²=0.201 | 0.654 |  |  |  |  |  | χ²=0.000 | 1.000 |  |
| No | 43 (21.39) | 27 (20.45) | 16 (23.19) |  |  | 0.065 |  | 28 (21.88) | 14 (21.88) | 14 (21.88) |  |  | 0.000 |
| Yes | 158 (78.61) | 105 (79.55) | 53 (76.81) |  |  | -0.065 |  | 100 (78.12) | 50 (78.12) | 50 (78.12) |  |  | 0.000 |
| CCRT,n (%) |  |  |  | χ²=9.342 | **0.002** |  |  |  |  |  | χ²=0.068 | 0.795 |  |
| No | 145 (72.14) | 86 (65.15) | 59 (85.51) |  |  | 0.578 |  | 111 (86.72) | 56 (87.50) | 55 (85.94) |  |  | -0.045 |
| Yes | 56 (27.86) | 46 (34.85) | 10 (14.49) |  |  | -0.578 |  | 17 (13.28) | 8 (12.50) | 9 (14.06) |  |  | 0.045 |
| Immunotherapy during Radiotherapy, n (%) |  |  |  | χ²=3.253 | 0.071 |  |  |  |  |  | χ²=0.513 | 0.474 |  |
| No | 175 (87.06) | 119 (90.15) | 56 (81.16) |  |  | -0.230 |  | 107 (83.59) | 55 (85.94) | 52 (81.25) |  |  | -0.120 |
| Yes | 26 (12.94) | 13 (9.85) | 13 (18.84) |  |  | 0.230 |  | 21 (16.41) | 9 (14.06) | 12 (18.75) |  |  | 0.120 |
| Consolidative Immunotherapy, n (%) |  |  |  | χ²=1.260 | 0.262 |  |  |  |  |  | χ²=0.000 | 1.000 |  |
| No | 110 (54.73) | 76 (57.58) | 34 (49.28) |  |  | -0.166 |  | 68 (53.12) | 34 (53.12) | 34 (53.12) |  |  | 0.000 |
| Yes | 91 (45.27) | 56 (42.42) | 35 (50.72) |  |  | 0.166 |  | 60 (46.88) | 30 (46.88) | 30 (46.88) |  |  | 0.000 |
